# Supplementary material for: MoOx-modified bimetallic alloy nanoparticles for highly efficient hydrogen production from hydrous hydrazine
Source: Royal Society of Chemistry journal article supplement (doi:10.1039/c9qi00379g), 2019-01-01
Supplement: c9qi00379g1.pdf [file c9qi00379g1.pdf]

**MoO<sub>x</sub>-modified bimetallic alloy nanoparticles for highly efficient  
hydrogen production from hydrous hydrazine**

Qilu Yao, Meng He, Xiaoling Hong, Xiaoliang Zhang, Zhang-Hui Lu\*

*Institute of Advanced Materials (IAM), College of Chemistry and Chemical  
Engineering, Jiangxi Normal University, Nanchang 330022, P.R. China.*

E-mail: luzh@jxnu.edu.cn

**Table S1** Catalysts composition determined by inductively coupled plasma atomic emission spectroscopic (ICP-AES).

| <b>Catalysts</b>                                                    | <b>Ni/Pt<br/>(molar ratio)</b> | <b>Mo<br/>(mol%)</b> |
|---------------------------------------------------------------------|--------------------------------|----------------------|
| Ni <sub>0.2</sub> Pt <sub>0.8</sub> -MoO <sub>x</sub> (16.7mol% Mo) | 0.23/0.77                      | 16.3                 |
| Ni <sub>0.4</sub> Pt <sub>0.6</sub> -MoO <sub>x</sub> (16.7mol% Mo) | 0.38/0.62                      | 16.2                 |
| Ni <sub>0.6</sub> Pt <sub>0.4</sub> -MoO <sub>x</sub> (16.7mol% Mo) | 0.61/0.39                      | 16.5                 |
| Ni <sub>0.8</sub> Pt <sub>0.2</sub> -MoO <sub>x</sub> (16.7mol% Mo) | 0.82/0.18                      | 16.8                 |
| Ni-MoO <sub>x</sub> (16.7mol% Mo)                                   | ~                              | 16.6                 |
| Pt-MoO <sub>x</sub> (16.7mol% Mo)                                   | ~                              | 16.3                 |

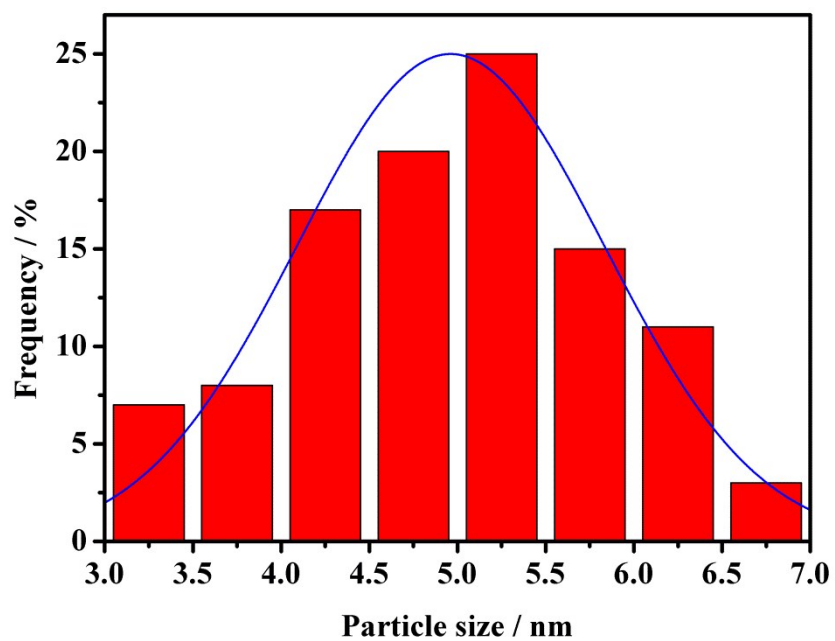

**Fig. S1** Particle size distribution of NiPt-MoO<sub>x</sub> catalyst.

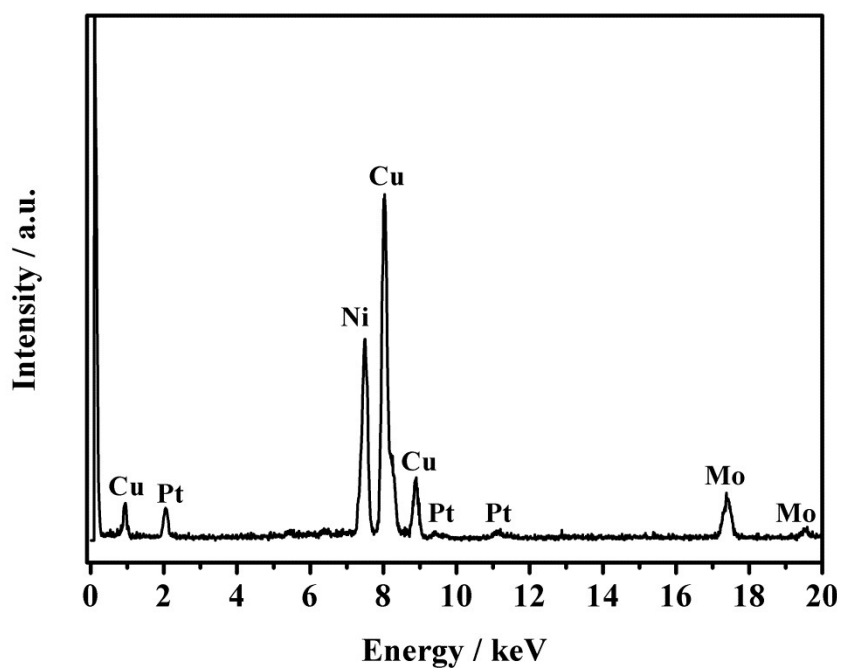

**Fig. S2** The corresponding EDX spectrum of the NiPt-MoO<sub>x</sub> catalyst. The Cu signal originates from Cu grid.

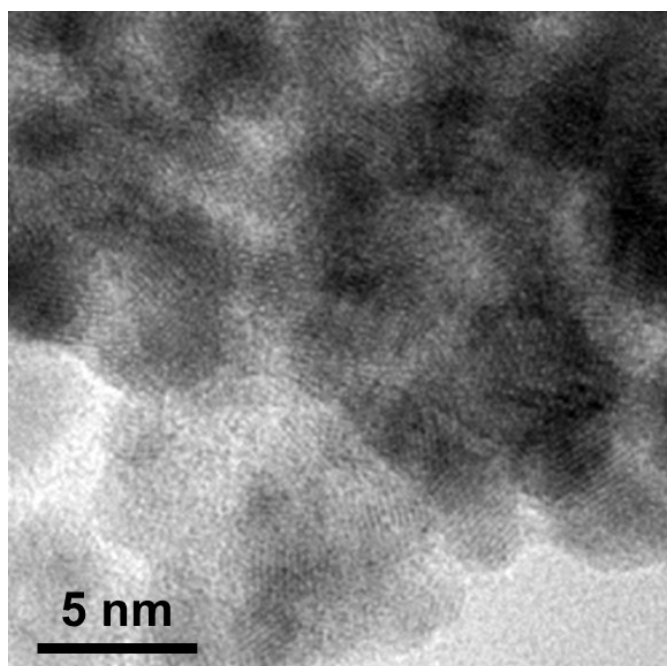

**Fig. S3** HRTEM image of the NiPt-MoO<sub>x</sub> catalyst.

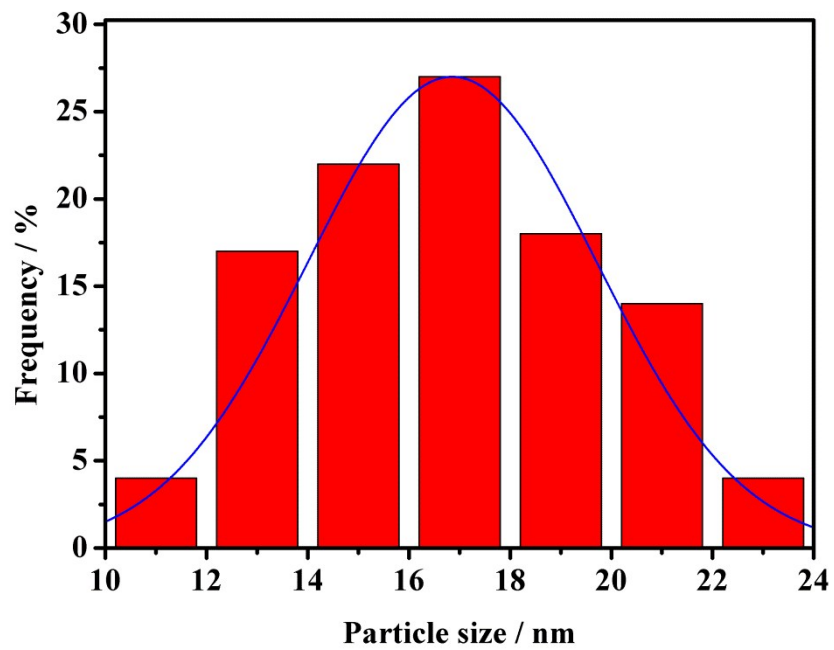

**Fig. S4** Particle size distribution of NiPt catalyst.

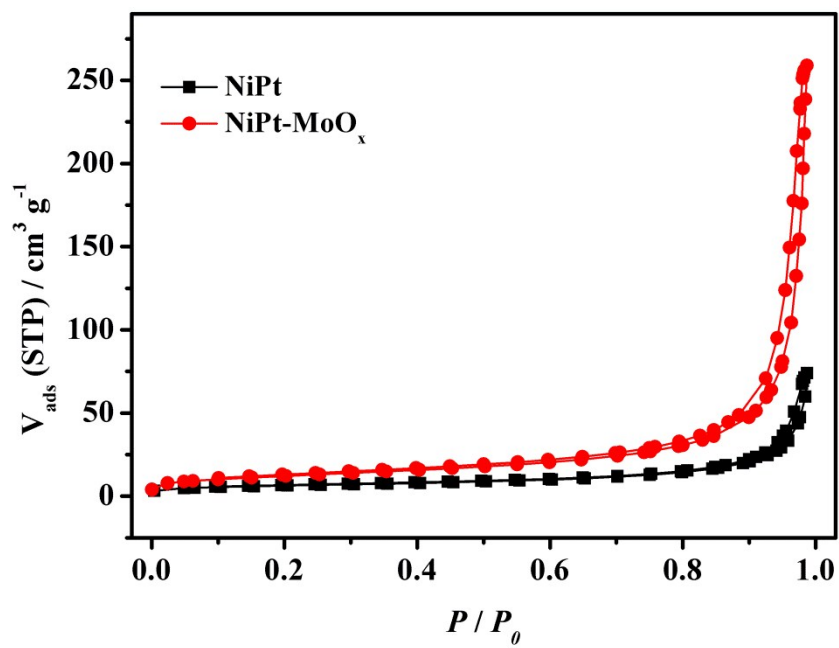

**Fig. S5** N<sub>2</sub> adsorption-desorption isotherms for NiPt-MoO<sub>x</sub> and NiPt catalyst.

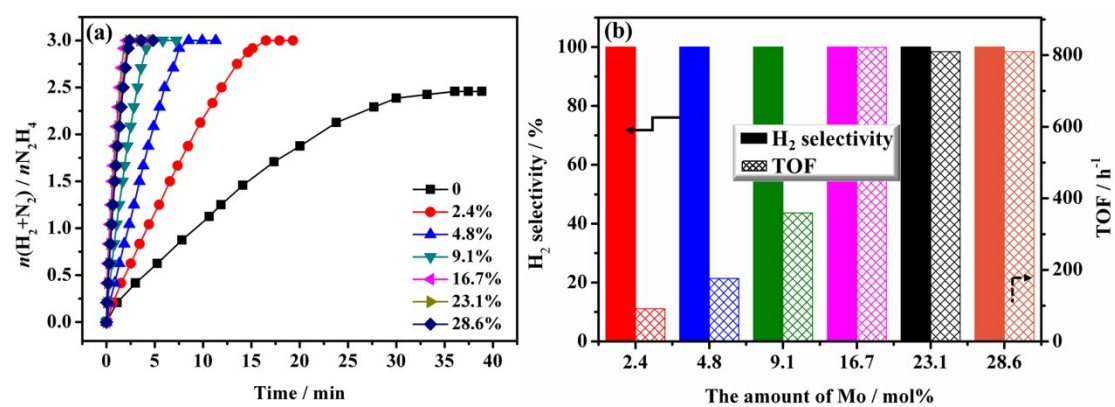

**Fig. S6** (a) Time course plots and (b) the related hydrogen selectivity and TOF values for H<sub>2</sub> evolution from N<sub>2</sub>H<sub>4</sub>·H<sub>2</sub>O (200 mM, 5 mL) decomposition over Ni<sub>0.6</sub>Pt<sub>0.4</sub>-MoO<sub>x</sub> catalysts with different Mo contents in the presence of NaOH (1.0 M) at 323 K.



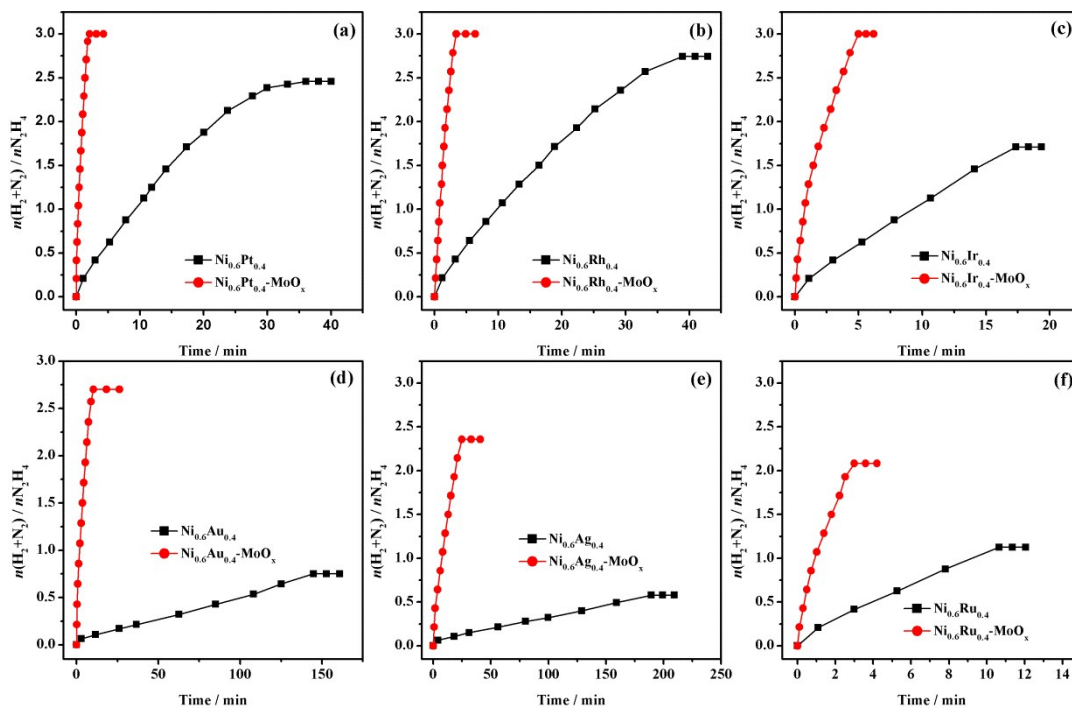

**Fig. S7** Time course plots for H<sub>2</sub> evolution from N<sub>2</sub>H<sub>4</sub>·H<sub>2</sub>O (200 mM, 5 mL) decomposition over Ni<sub>0.6</sub>M<sub>0.4</sub>-MoO<sub>x</sub> and Ni<sub>0.6</sub>M<sub>0.4</sub> (M = Pt, Rh, Ir, Au, Ag, and Ru) catalysts in the presence of NaOH (1.0 M) at 323 K.

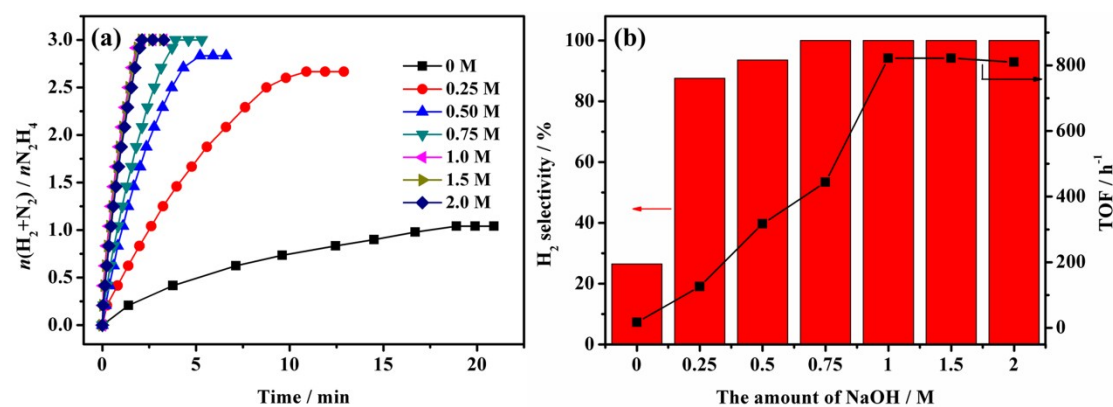

**Fig. S8.** (a) Time course plots and (b) the related hydrogen selectivity and TOF values for  $\text{H}_2$  evolution from  $\text{N}_2\text{H}_4 \cdot \text{H}_2\text{O}$  (200 mM, 5 mL) decomposition over NiPt-MoO<sub>x</sub> catalysts with different concentrations of NaOH at 323 K.

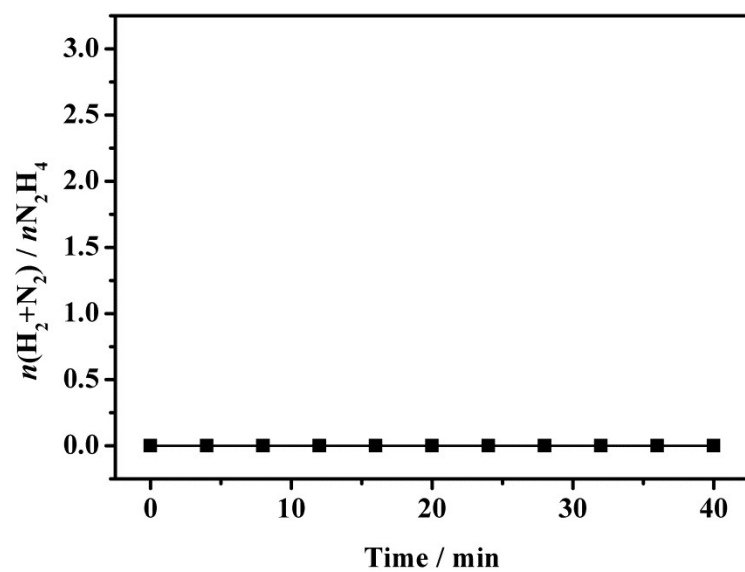

**Fig. S9** Time course plots for H<sub>2</sub> evolution from N<sub>2</sub>H<sub>4</sub>·H<sub>2</sub>O (200 mM, 5 mL) decomposition in the presence of NaOH (1.0 M) at 323 K.

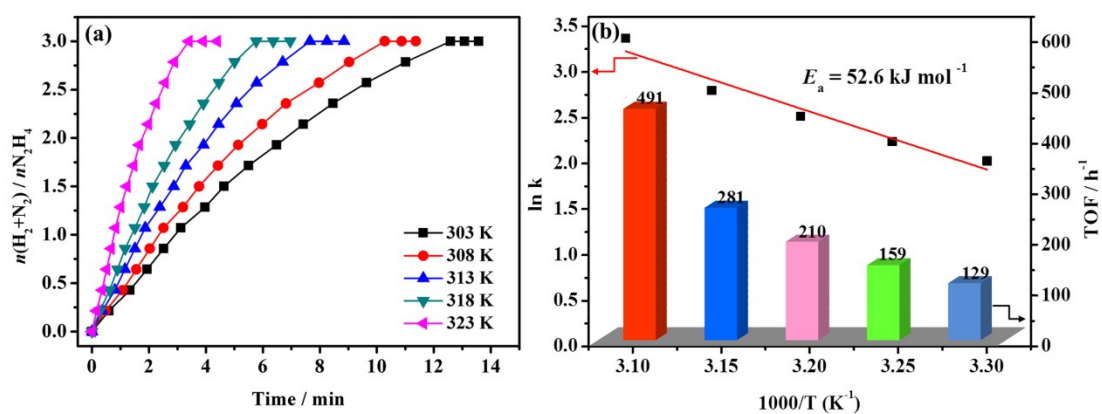

**Fig. S10** (a) Time course plots for H<sub>2</sub> evolution from N<sub>2</sub>H<sub>4</sub> aqueous solution (200 mM, 5 mL) over Ni<sub>0.6</sub>Rh<sub>0.4</sub>-MoO<sub>x</sub> catalyst at different temperatures. (b) The corresponding TOF values and Arrhenius plots ( $\ln k$  versus  $1/T$ ) for H<sub>2</sub> evolution from N<sub>2</sub>H<sub>4</sub> aqueous solution.

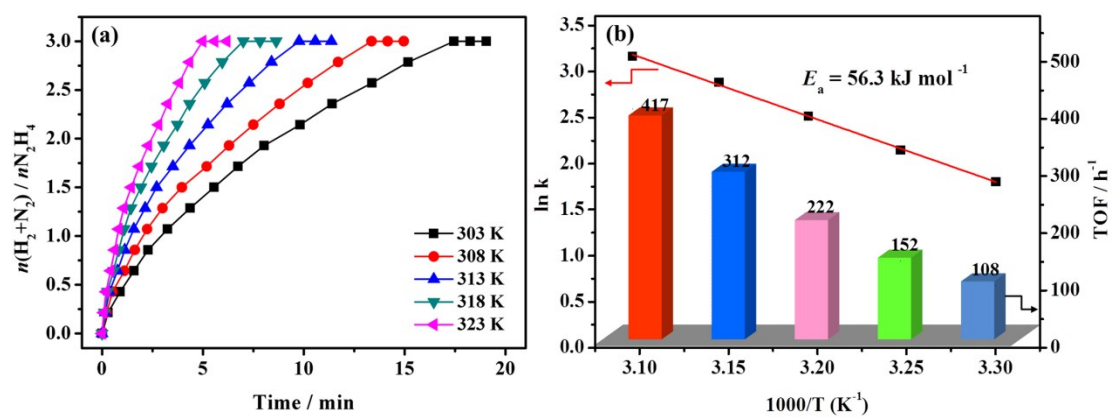

**Fig. S11** (a) Time course plots for H<sub>2</sub> evolution from N<sub>2</sub>H<sub>4</sub> aqueous solution (200 mM, 5 mL) over Ni<sub>0.6</sub>Ir<sub>0.4</sub>-MoO<sub>x</sub> catalyst at different temperatures. (b) The corresponding TOF values and Arrhenius plots ( $\ln k$  versus  $1/T$ ) for H<sub>2</sub> evolution from N<sub>2</sub>H<sub>4</sub> aqueous solution.

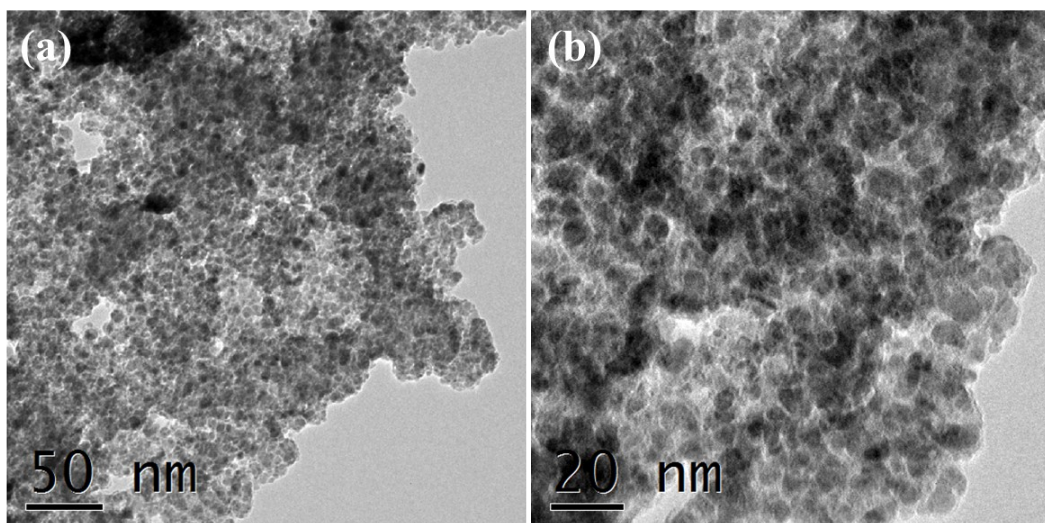

**Fig. S12** TEM images of Ni<sub>0.6</sub>Pt<sub>0.4</sub>-MoO<sub>x</sub> after the durability test.

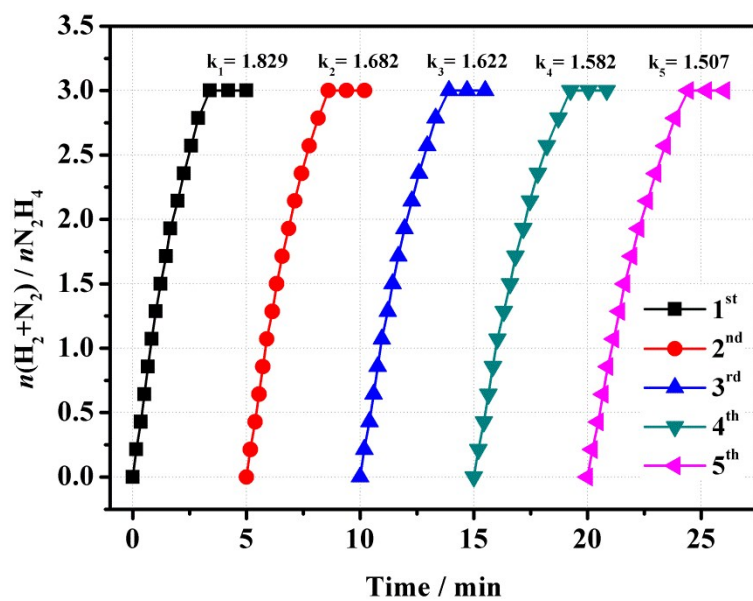

**Fig. S13** Stability test for H<sub>2</sub> evolution from N<sub>2</sub>H<sub>4</sub> aqueous solution (200 mM, 5 mL) over Ni<sub>0.6</sub>Rh<sub>0.4</sub>-MoO<sub>x</sub> NPs at 323 K.

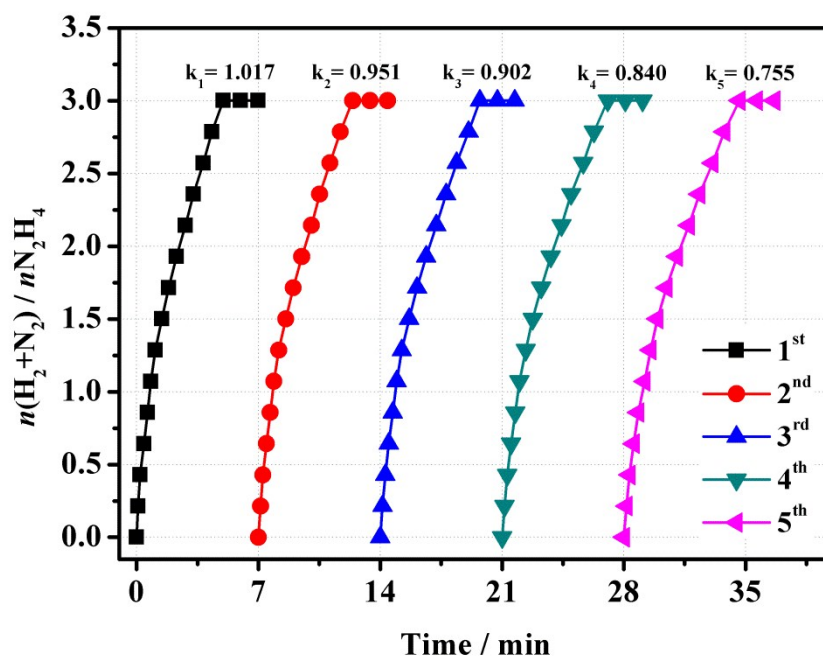

**Fig. S14** Stability test for H<sub>2</sub> evolution from N<sub>2</sub>H<sub>4</sub> aqueous solution (200 mM, 5 mL) over Ni<sub>0.6</sub>Ir<sub>0.4</sub>-MoO<sub>x</sub> NPs at 323 K.



**Table S2** Comparison of activities of different catalysts for hydrogen evolution from  $\text{N}_2\text{H}_4 \cdot \text{H}_2\text{O}$  aqueous solution.

| Catalysts                                                                   | T<br>(K) | $\text{H}_2$ Selectivity<br>(%) | TOF<br>( $\text{h}^{-1}$ ) | $E_a$<br>( $\text{kJ mol}^{-1}$ ) | Ref.      |
|-----------------------------------------------------------------------------|----------|---------------------------------|----------------------------|-----------------------------------|-----------|
| $\text{Pt}_{0.6}\text{Ni}_{0.4}/\text{PDA-rGO}$                             | 30       | 100                             | 903                        | 33.39                             | S1        |
| $\text{Ni}_{0.6}\text{Pt}_{0.4}\text{-MoO}_x$                               | 50       | 100                             | 822                        | 49.6                              | This work |
| $(\text{Ni}_3\text{Pt}_7)_{0.5}\text{-}(\text{MnO}_x)_{0.5}/\text{NPC-900}$ | 50       | 100                             | 706                        | 50.15                             | S2        |
| $\text{Ni}_{0.8}\text{Pt}_{0.2}/\text{MIL-101-NH}_2$                        | 50       | 100                             | 676                        | 53.2                              | S3        |
| $\text{Ni}_{40}\text{Pt}_{60}\text{-CNDs}$                                  | 50       | 100                             | 594                        | 43.9                              | S4        |
| $\text{Ni}_{84}\text{Pt}_{16}/\text{graphene}$                              | 50       | 100                             | 415                        | 40                                | S5        |
| $\text{Ni}_3\text{Pt}_7/\text{graphene}$                                    | 50       | 100                             | 416                        | 49.36                             | S6        |
| $\text{Ni}_{88}\text{Pt}_{12}/\text{MIL-101}$                               | 50       | 100                             | 350                        | 55.5                              | S7        |
| $\text{Ni}@/\text{Ni-Pt}/\text{La}_2\text{O}_3$                             | 50       | 100                             | 312                        | 56.20                             | S8        |
| $\text{G}_4\text{-OH}(\text{Pt}_{12}\text{Ni}_{48})$                        | 70       | 100                             | 240                        | -                                 | S9        |
| $\text{PtNi}/\text{C}$                                                      | 50       | 100                             | 210                        | 55.3                              | S10       |
| $\text{Ni}_3\text{Pt}_7/\text{BNG-1000}$                                    | 25       | 100                             | 199.4                      | 28.4                              | S11       |
| $\text{Ni}_{87}\text{Pt}_{13}/\text{meso-Al}_2\text{O}_3$                   | 50       | 100                             | 160                        | 55.7                              | S12       |
| $\text{Ni}_6\text{Pt}_4\text{-SF}$                                          | 25       | 100                             | 150                        | -                                 | S13       |
| $\text{Ni}_{80}\text{Pt}_{20}@/\text{ZIF-8}$                                | 50       | 100                             | 90                         | -                                 | S14       |
| $\text{Ni}_{0.90}\text{Pt}_{0.05}\text{Rh}_{0.05}/\text{La}_2\text{O}_3$    | 25       | 100                             | 45.9                       | -                                 | S15       |
| $\text{Ni}_{0.9}\text{Pt}_{0.1}/\text{Ce}_2\text{O}_3$                      | 25       | 100                             | 28.1                       | 42.3                              | S16       |
| $\text{NiPt}_{0.057}/\text{Al}_2\text{O}_3$                                 | 30       | 99                              | 16.5                       | 34.0                              | S17       |

### Calculation method for TOF

The turn over frequency (*TOF*) reported in this work is an apparent *TOF* value based on the number of metal (Ni + Pt) atoms in catalysts, which is calculated from the equation as follows:

$$\text{TOF} = \frac{2P_{\text{atm}}V_{H_2+N_2}/RT}{3n_{\text{Ni+Pt}} \times t} \quad (\text{S1})$$

Where  $P_{\text{atm}}$  is the atmospheric pressure,  $V_{H_2+N_2}$  is the volume of generated gas when the conversion reached 50%,  $R$  is the universal gas constant,  $T$  is the room temperature,  $n_{\text{Ni+Pt}}$  is the total number of moles of (Ni + Pt) atoms in the catalyst and  $t$  is the time in hour when the conversion reached 50%.

## References

- S1 F. Z. Song, Q. L. Zhu and Q. Xu, *J. Mater. Chem. A*, 2015, **3**, 23090–23094.
- S2 B. Xia, T. Liu, W. Luo and G. Cheng, *J. Mater. Chem. A*, 2016, **4**, 5616–5622.
- S3 P. L. Liu, X. J. Gu, Y. Y. Wu, J. Cheng, H. Su, *Int. J. Hydrogen Energy*, 2017, **42**, 19096–19105.
- S4 J. K. Sun and Q. Xu, *ChemCatChem*, 2015, **7**, 526–531.
- S5 Y. Du, J. Su, W. Luo and G. Z. Cheng, *ACS Appl. Mater. Interfaces*, 2015, **7**, 1031–1034.
- S6 N. Cao, L. Yang, C. Du, J. Su, W. Luo and G. Z. Cheng, *J. Mater. Chem. A*, 2014, **2**, 14344–14347.
- S7 N. Cao, J. Su, W. Luo and G. Z. Cheng, *Int. J. Hydrogen Energy*, **2014**, *39*, 9726–9734.
- S8 Y. J. Zhong, H. B. Dai, Y. Y. Jiang, D. M. Chen, M. S. Zhu, X. Li and P. Wang, *J. Power Sources*, 2015, **300**, 294–300.
- S9 K. Aranishi, A. K. Singh and Q. Xu, *ChemCatChem*, 2013, **5**, 2248–2252.
- S10 S. N. Oliaee, C. Zhang, S. Y. Hwang, H. M. Cheung and Z. Peng, *J. Phys. Chem. C*, 2016, **120**, 9764–9772.
- S11 X. Q. Du, C. Du, P. Cai, W. Luo and G. Z. Cheng, *ChemCatChem*, 2016, **8**, 1410–1416.
- S12 Y. Jiang, Q. Kang, J. Zhang, H. B. Dai and P. Wang, *J. Power Sources*, 2015, **273**, 554–560.
- S13 A. K. Singh and Q. Xu, *Int. J. Hydrogen Energy*, 2014, **39**, 9128–9134.
- S14 A. K. Singh and Q. Xu, *ChemCatChem*, 2013, **5**, 3000–3004.
- S15 S. I. O, J. M. Yan, H. L. Wang, Z. L. Wang and Q. Jiang, *J. Power Sources*, **2014**, *262*, 386–390.
- S16 H. L. Wang, J. M. Yan, Z. L. Wang, S. I. O and Q. Jiang, *J. Mater. Chem. A*, 2013, **1**, 14957–14962.
- S17 L. He, Y. Huang, A. Wang, Y. Liu, X. Liu, X. Chen, J. J. Delgado, X. Wang and T. Zhang, *J. Catal.*, **2013**, *298*, 1–9.
